# Supplementary material for: Enhanced photocatalytic efficiency of porous ZnO coral-like nanoplates for organic dye degradation
Source: Royal Society of Chemistry journal article supplement (doi:10.1039/d4ra01345j), 2024-01-01
Supplement: d4ra01345j1.pdf [file d4ra01345j1.pdf]

## Supporting Information

### Enhanced Photocatalytic Efficiency of Porous ZnO Coral-like Nanoplates for Organic Dye Degradation

Nguyen Hong Hanh, <sup>\*a</sup> Quan Thi Minh Nguyet,<sup>b</sup> Tran Van Chinh,<sup>c</sup> La Duc Duong,<sup>c</sup> Tran Xuan Tien,<sup>d</sup> Lai Van Duy,<sup>\*c, f, g</sup> Nguyen Duc Hoa<sup>c</sup>

---

<sup>a</sup>*Institute of Engineering Physics, 17 Hoang Sam Street, Cau Giay District, Hanoi City, Vietnam.*

<sup>b</sup>*School of Engineering Physics, Hanoi University of Science and Technology (HUST), No 1 Dai Co Viet Street, Hanoi City, Vietnam.*

<sup>c</sup>*Institute of Chemistry and Materials, Inorganic Chemistry, 17 Hoang Sam Street, Cau Giay District, Hanoi City, Vietnam.*

<sup>d</sup>*Academy of Military Science and Technology, 17 Hoang Sam Street, Cau Giay District, Hanoi City, Vietnam.*

<sup>e</sup>*International Training Institute for Materials Science (ITIMS), Hanoi University of Science and Technology (HUST), No 1, Dai Co Viet Street, Hanoi, Vietnam.*

<sup>f</sup>*Department of Food Quality and Nutrition, Research and Innovation Centre, Fondazione Edmund Mach, 38010, San Michele all' Adige, TN, Italy.*

<sup>g</sup>*Department of Electronic Engineering, University of Rome Tor Vergata, 00133 Rome, Italy.*

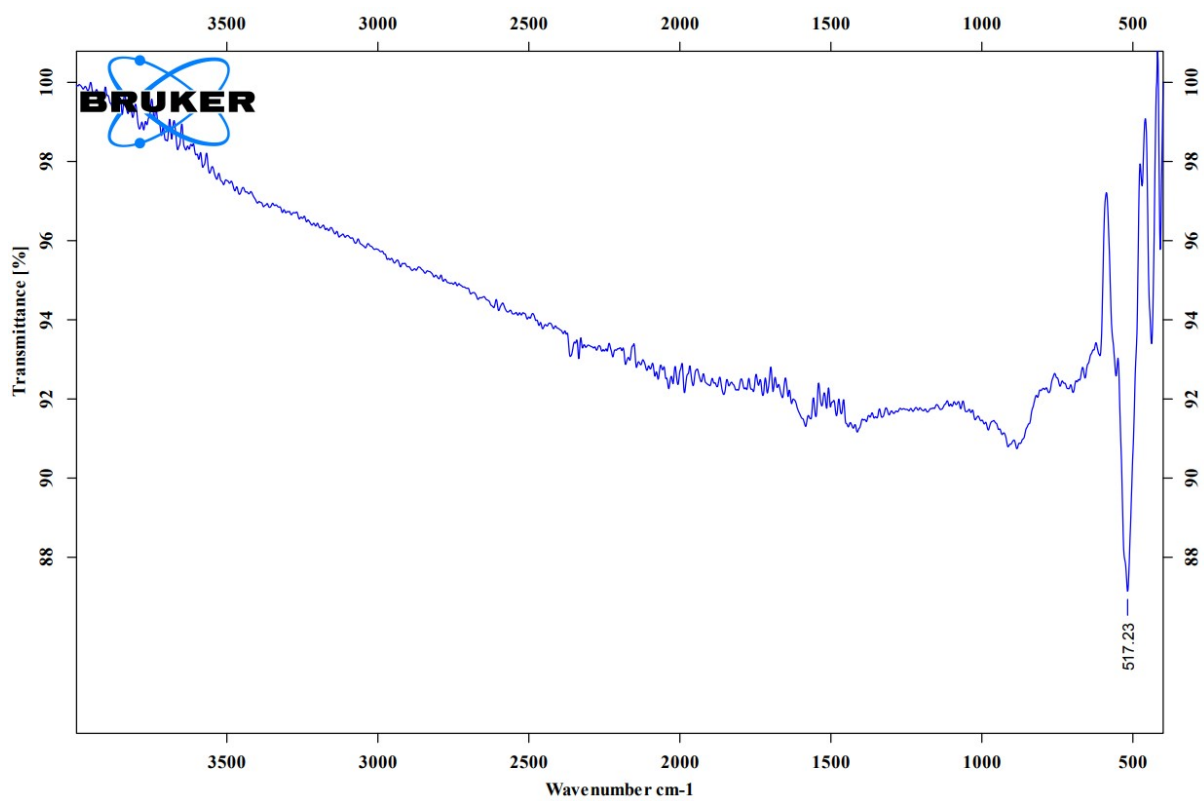

**Figure S1.** FTIR spectrum of spent ZnO nanoplates after used as photocatalyst for RhB degradation.
